# Supplementary material for: Analysis of the bonding’s energy in metal-halide perovskites and brief evaluation of meta-GGA functionals TPSS and revTPSS
Source: Springer Nature journal article supplement (doi:10.1007/s10853-024-09381-2), 2024-02-01
Supplement: MOESM1 [file 26720480]

# Supporting Information of:

## Analysis of Energetic Bonding in Metal-Halide Perovskites and Brief Evaluation of Meta-GGA Functionals TPSS and revTPSS

José Juan Díaz<sup>1,\*</sup>, Iván Ornelas-Cruz<sup>1</sup>, Francisco J. Cano<sup>1,2</sup>, S. Velumani<sup>3</sup>, Salvador  
Gallardo-Hernández<sup>4</sup>, Iouri Koudriavtsev<sup>5</sup>, Svetlana Mansurova<sup>6</sup>

<sup>1</sup>Programa de Nanociencias y Nanotecnología, CINVESTAV- IPN, Av. IPN 2508 Col. San  
Pedro Zacatenco, 07360 Ciudad de México.

<sup>2</sup>Institute of Molecular and Materials of Le Mans e UMR-CNRS 6283, Le Mans Université,  
70285 Le Mans, France.

<sup>3</sup>J. Mike Walker '66 Department of Mechanical Engineering, Texas A&M University,  
College Station, TX 77843, USA.

<sup>4</sup>Departamento de Física, CINVESTAV- IPN, Av. IPN 2508 Col. San Pedro Zacatenco,  
07360 Ciudad de México.

<sup>5</sup>Departamento de Ingeniería Eléctrica (SEES), CINVESTAV- IPN, Av. IPN 2508 Col. San  
Pedro Zacatenco, 07360 Ciudad de México,

<sup>6</sup>Instituto Nacional de Astrofísica, Departamento de Óptica y Electrónica, Luis Enrique  
Erro 1, Tonantzintla, 72840 Heroica Puebla de Zaragoza, Puebla, México.

\*Corresponding author: [jose.diaz@cinvestav.mx](mailto:jose.diaz@cinvestav.mx)

## Basis set convergence: DND vs DNP

**Table S1.** Energy convergence of the basis sets DND and DNP as a function of the cutoff radii for MAPI only and with a 4x4x3 k-grid.

| DND      |              |               |              | DNP      |              |               |              |
|----------|--------------|---------------|--------------|----------|--------------|---------------|--------------|
| Radii    | Energy (Ha)  | Energy (eV)   | ΔEnergy (eV) | Radii    | Energy (Ha)  | Energy (eV)   | ΔEnergy (eV) |
| 3.100000 | -3135.119339 | -85310.986389 |              | 3.100000 | -3135.207582 | -85313.387600 |              |
| 3.300000 | -3135.426254 | -85319.337963 | 8.351573     | 3.300000 | -3135.505419 | -85321.492150 | 8.104551     |
| 3.500000 | -3135.606935 | -85324.254543 | 4.916580     | 3.500000 | -3135.679610 | -85326.232150 | 4.740000     |
| 3.700000 | -3135.662703 | -85325.772079 | 1.517536     | 3.700000 | -3135.730510 | -85327.617194 | 1.385044     |
| 3.900000 | -3135.668591 | -85325.932308 | 0.160229     | 3.900000 | -3135.734279 | -85327.719757 | 0.102562     |
| 4.100000 | -3135.720869 | -85327.354866 | 1.422558     | 4.100000 | -3135.785271 | -85329.107326 | 1.387569     |
| 4.300000 | -3135.691882 | -85326.566067 | -0.788799    | 4.300000 | -3135.755018 | -85328.284102 | -0.823224    |
| 4.500000 | -3135.712733 | -85327.133452 | 0.567385     | 4.500000 | -3135.776282 | -85328.862723 | 0.578620     |
| 4.700000 | -3135.707137 | -85326.981193 | -0.152259    | 4.700000 | -3135.770987 | -85328.718627 | -0.144095    |
| 4.900000 | -3135.703988 | -85326.895488 | -0.085705    | 4.900000 | -3135.766840 | -85328.605793 | -0.112835    |
| 5.100000 | -3135.698038 | -85326.733589 | -0.161900    | 5.100000 | -3135.760707 | -85328.438889 | -0.166904    |
| 5.300000 | -3135.722981 | -85327.412312 | 0.678723     | 5.300000 | -3135.786708 | -85329.146434 | 0.707545     |
| 5.500000 | -3135.671906 | -85326.022492 | -1.389820    | 5.500000 | -3135.735827 | -85327.761872 | -1.384562    |
| 5.700000 | -3135.737932 | -85327.819152 | 1.796660     | 5.700000 | -3135.800677 | -85329.526542 | 1.764670     |
| 5.900000 | -3135.675298 | -85326.114799 | -1.704353    | 5.900000 | -3135.737370 | -85327.803865 | -1.722678    |
| 6.100000 | -3135.695583 | -85326.666774 | 0.551975     | 6.100000 | -3135.758521 | -85328.379421 | 0.575556     |
| 6.300000 | -3135.743901 | -85327.981574 | 1.314800     | 6.300000 | -3135.808092 | -85329.728301 | 1.348880     |
| 6.500000 | -3135.728513 | -85327.562867 | -0.418707    | 6.500000 | -3135.792846 | -85329.313439 | -0.414862    |
| 6.700000 | -3135.729180 | -85327.581003 | 0.018136     | 6.700000 | -3135.793501 | -85329.331276 | 0.017837     |
| 6.900000 | -3135.728586 | -85327.564842 | -0.016161    | 6.900000 | -3135.792898 | -85329.314867 | -0.016408    |
| 7.100000 | -3135.729625 | -85327.593129 | 0.028286     | 7.100000 | -3135.793932 | -85329.342993 | 0.028126     |
| 7.300000 | -3135.728665 | -85327.567003 | -0.026126    | 7.300000 | -3135.792964 | -85329.316647 | -0.026346    |
| 7.500000 | -3135.729539 | -85327.590767 | 0.023764     | 7.500000 | -3135.793831 | -85329.340258 | 0.023611     |
| 7.700000 | -3135.730235 | -85327.609719 | 0.018953     | 7.700000 | -3135.794519 | -85329.358972 | 0.018713     |
| 7.900000 | -3135.729561 | -85327.591379 | -0.018340    | 7.900000 | -3135.793835 | -85329.340348 | -0.018623    |
| 8.100000 | -3135.730122 | -85327.606642 | 0.015263     | 8.100000 | -3135.794387 | -85329.355372 | 0.015023     |
| 8.300000 | -3135.731230 | -85327.636795 | 0.030153     | 8.300000 | -3135.795486 | -85329.385288 | 0.029916     |
| 8.500000 | -3135.731951 | -85327.656414 | 0.019619     | 8.500000 | -3135.796197 | -85329.404632 | 0.019345     |

## k-mesh convergence: MAPI and FAPI

**Table S2.** Energy convergence as a function of the k-grid for MAPI, having used the DND basis set with a cut off radii of 6.5 Å.

| k-mesh | Energy (Ha)  | Energy (eV)   | ΔEnergy (eV) |
|--------|--------------|---------------|--------------|
| 1x1x1  | -3135.598493 | -85324.024827 |              |
| 2x2x1  | -3135.692123 | -85326.572641 | 2.547814     |
| 3x3x2  | -3135.730366 | -85327.613292 | 1.040651     |
| 4x4x3  | -3135.728513 | -85327.562867 | -0.050425    |
| 5x5x4  | -3135.728783 | -85327.570198 | 0.007331     |
| 6x6x4  | -3135.728791 | -85327.570432 | 0.000234     |
| 7x7x5  | -3135.728753 | -85327.569378 | -0.001053    |
| 8x8x5  | -3135.728753 | -85327.569387 | 0.000008     |
| 8x8x6  | -3135.728760 | -85327.569566 | 0.000180     |
| 9x9x6  | -3135.728760 | -85327.569566 | 0.000000     |

**Table S3.** Energy convergence as a function of the k-grid for MAPI, having used the DNP basis set with a cut off radii of 6.5 Å.

| k-mesh | Energy (Ha)  | Energy (eV)   | ΔEnergy (eV) |
|--------|--------------|---------------|--------------|
| 1x1x1  | -3135.663084 | -85325.782455 |              |
| 2x2x1  | -3135.756490 | -85328.324155 | 2.541700     |
| 3x3x2  | -3135.794696 | -85329.363780 | 1.039625     |
| 4x4x3  | -3135.792846 | -85329.313439 | -0.050341    |
| 5x5x4  | -3135.793114 | -85329.320753 | 0.007314     |
| 6x6x4  | -3135.793123 | -85329.320987 | 0.000234     |
| 7x7x5  | -3135.793084 | -85329.319937 | -0.001050    |
| 8x8x5  | -3135.793085 | -85329.319948 | 0.000011     |
| 8x8x6  | -3135.793091 | -85329.320125 | 0.000177     |
| 9x9x6  | -3135.793091 | -85329.320125 | 0.000000     |

**Table S4.** Energy convergence as a function of the k-grid for FAPI, having used the DND basis set with a cut off radii of 6.5 Å.

| k-mesh | Energy (Ha)  | Energy (eV)   | ΔEnergy (eV) |
|--------|--------------|---------------|--------------|
| 1x1x1  | -3351.788255 | -91206.850930 |              |
| 2x2x1  | -3351.898413 | -91209.848478 | 2.997548     |
| 3x3x2  | -3351.940740 | -91211.000239 | 1.151761     |
| 4x4x3  | -3351.938616 | -91210.942453 | -0.057786    |
| 5x5x4  | -3351.938978 | -91210.952298 | 0.009845     |
| 6x6x4  | -3351.938992 | -91210.952681 | 0.000384     |
| 7x7x5  | -3351.938939 | -91210.951239 | -0.001442    |
| 8x8x5  | -3351.938940 | -91210.951264 | 0.000024     |
| 8x8x6  | -3351.938949 | -91210.951525 | 0.000261     |
| 9x9x6  | -3351.938949 | -91210.951525 | 0.000000     |

## Cubo-octahedral centers

**Table S5.** Centers of the four cubo-octahedral cages within the unit-cell of CsPI, due to periodicity it was used the positions of eight Pb atoms.

| Cubo-octahedral cage 1 |                   |                   |                   | Cubo-octahedral cage 2 |                    |                   |                   |
|------------------------|-------------------|-------------------|-------------------|------------------------|--------------------|-------------------|-------------------|
| Pb                     | x                 | y                 | z                 | Pb                     | x                  | y                 | z                 |
| 1                      | 4.14082852        | -4.51342862       | 12.79322925       | 1                      | -0.00779255        | -0.00470997       | 12.60290321       |
| 2                      | -0.00779255       | -0.00470997       | 12.60290321       | 2                      | -4.14911847        | 4.51845501        | 12.40772433       |
| 3                      | 4.14082852        | 4.58997672        | 12.32187535       | 3                      | -0.00779255        | 9.09869538        | 12.13154931       |
| 4                      | 8.28215444        | 0.06681175        | 12.51705422       | 4                      | 4.14082852         | 4.58997672        | 12.32187535       |
| 5                      | 4.13767834        | -4.51645992       | 6.49218937        | 5                      | -0.00746095        | -0.00124781       | 6.30224871        |
| 6                      | -0.00746095       | -0.00124781       | 6.30224871        | 6                      | -4.15226865        | 4.51542370        | 6.10668445        |
| 7                      | 4.13767834        | 4.58694542        | 6.02083547        | 7                      | -0.00746095        | 9.10215753        | 5.83089481        |
| 8                      | 8.28248604        | 0.07027390        | 6.21639973        | 8                      | 4.13767834         | 4.58694542        | 6.02083547        |
| <b>Center</b>          | <b>4.13830009</b> | <b>0.03477018</b> | <b>9.40834191</b> | <b>Center</b>          | <b>-0.00667341</b> | <b>4.55071200</b> | <b>9.21558946</b> |

  

| Cubo-octahedral cage 3 |                   |                   |                   | Cubo-octahedral cage 4 |                    |                   |                   |
|------------------------|-------------------|-------------------|-------------------|------------------------|--------------------|-------------------|-------------------|
| Pb                     | x                 | y                 | z                 | Pb                     | x                  | y                 | z                 |
| 1                      | 4.13767834        | -4.51645992       | 6.49218937        | 1                      | -0.00746095        | -0.00124781       | 6.30224871        |
| 2                      | -0.00746095       | -0.00124781       | 6.30224871        | 2                      | -4.15226865        | 4.51542370        | 6.10668445        |
| 3                      | 4.13767834        | 4.58694542        | 6.02083547        | 3                      | -0.00746095        | 9.10215753        | 5.83089481        |
| 4                      | 8.28248604        | 0.07027390        | 6.21639973        | 4                      | 4.13767834         | 4.58694542        | 6.02083547        |
| 5                      | 4.14082852        | -4.51342862       | 0.19152925        | 5                      | -0.00779255        | -0.00470997       | 0.00120321        |
| 6                      | -0.00779255       | -0.00470997       | 0.00120321        | 6                      | -4.14911847        | 4.51845501        | -0.19397567       |
| 7                      | 4.14082852        | 4.58997672        | -0.27982465       | 7                      | -0.00779255        | 9.09869538        | -0.47015069       |
| 8                      | 8.28215444        | 0.06681175        | -0.08464578       | 8                      | 4.14082852         | 4.58997672        | -0.27982465       |
| <b>Center</b>          | <b>4.13830009</b> | <b>0.03477018</b> | <b>3.10749191</b> | <b>Center</b>          | <b>-0.00667341</b> | <b>4.55071200</b> | <b>2.91473946</b> |

**Table S6.** Centers of the four cubo-octahedral cages within the unit-cell of MAPI, due to periodicity it was used the positions of eight Pb atoms.

| Cubo-octahedral cage 1 |                   |                   |                   | Cubo-octahedral cage 2 |                   |                   |                   |
|------------------------|-------------------|-------------------|-------------------|------------------------|-------------------|-------------------|-------------------|
| Pb                     | x                 | y                 | z                 | Pb                     | x                 | y                 | z                 |
| 1                      | 4.45390672        | -4.33926380       | 12.98840640       | 1                      | 0.03691355        | 0.13448970        | 12.98942166       |
| 2                      | 0.03691355        | 0.13448970        | 12.98942166       | 2                      | -4.50569321       | 4.62024398        | 12.98349611       |
| 3                      | 4.45390672        | 4.62063537        | 12.98455946       | 3                      | 0.03691355        | 9.09438887        | 12.98557472       |
| 4                      | 8.99651348        | 0.13488109        | 12.99048501       | 4                      | 4.45390672        | 4.62063537        | 12.98455946       |
| 5                      | 4.44835177        | -4.60044511       | 6.58157134        | 5                      | 0.02365334        | -0.12794633       | 6.58181725        |
| 6                      | 0.02365334        | -0.12794633       | 6.58181725        | 6                      | -4.51124816       | 4.35906267        | 6.57666105        |
| 7                      | 4.44835177        | 4.35945407        | 6.57772440        | 7                      | 0.02365334        | 8.83195285        | 6.57797031        |
| 8                      | 8.98325327        | -0.12755493       | 6.58288060        | 8                      | 4.44835177        | 4.35945407        | 6.57772440        |
| <b>Center</b>          | <b>4.48060633</b> | <b>0.00678126</b> | <b>9.78460827</b> | <b>Center</b>          | <b>0.00080636</b> | <b>4.48653515</b> | <b>9.78215312</b> |

  

| Cubo-octahedral cage 3 |                   |                   |                   | Cubo-octahedral cage 4 |                   |                   |                   |
|------------------------|-------------------|-------------------|-------------------|------------------------|-------------------|-------------------|-------------------|
| Pb                     | x                 | y                 | z                 | Pb                     | x                 | y                 | z                 |
| 1                      | 4.44835177        | -4.60044511       | 6.58157134        | 1                      | 0.02365334        | -0.12794633       | 6.58181725        |
| 2                      | 0.02365334        | -0.12794633       | 6.58181725        | 2                      | -4.51124816       | 4.35906267        | 6.57666105        |
| 3                      | 4.44835177        | 4.35945407        | 6.57772440        | 3                      | 0.02365334        | 8.83195285        | 6.57797031        |
| 4                      | 8.98325327        | -0.12755493       | 6.58288060        | 4                      | 4.44835177        | 4.35945407        | 6.57772440        |
| 5                      | 4.45390672        | -4.33926380       | 0.17220640        | 5                      | 0.03691355        | 0.13448970        | 0.17322166        |
| 6                      | 0.03691355        | 0.13448970        | 0.17322166        | 6                      | -4.50569321       | 4.62024398        | 0.16729611        |
| 7                      | 4.45390672        | 4.62063537        | 0.16835946        | 7                      | 0.03691355        | 9.09438887        | 0.16937472        |
| 8                      | 8.99651348        | 0.13488109        | 0.17428501        | 8                      | 4.45390672        | 4.62063537        | 0.16835946        |
| <b>Center</b>          | <b>4.48060633</b> | <b>0.00678126</b> | <b>3.37650827</b> | <b>Center</b>          | <b>0.00080636</b> | <b>4.48653515</b> | <b>3.37405312</b> |

**Table S7.** Centers of the four cubo-octahedral cages within the unit-cell of FAPI, due to periodicity it was used the positions of eight Pb atoms.

| Cubo-octahedral cage 1 |                   |                    |                   | Cubo-octahedral cage 2 |                    |                   |                   |
|------------------------|-------------------|--------------------|-------------------|------------------------|--------------------|-------------------|-------------------|
| Pb                     | x                 | y                  | z                 | Pb                     | x                  | y                 | z                 |
| 1                      | 4.49286298        | -4.54066856        | 12.81707061       | 1                      | -0.02424142        | -0.03175931       | 12.82631652       |
| 2                      | -0.02424142       | -0.03175931        | 12.82631652       | 2                      | -4.51881662        | 4.47769709        | 12.83432972       |
| 3                      | 4.49286298        | 4.48005844         | 12.85336105       | 3                      | -0.02424142        | 8.98896769        | 12.86260696       |
| 4                      | 8.98743818        | -0.02939796        | 12.84534785       | 4                      | 4.49286298         | 4.48005844        | 12.85336105       |
| 5                      | 4.48502282        | -4.52497455        | 6.40463895        | 5                      | -0.00648841        | -0.01687046       | 6.41278142        |
| 6                      | -0.00648841       | -0.01687046        | 6.41278142        | 6                      | -4.52665678        | 4.49339110        | 6.42189806        |
| 7                      | 4.48502282        | 4.49575245         | 6.44092939        | 7                      | -0.00648841        | 9.00385654        | 6.44907186        |
| 8                      | 9.00519119        | -0.01450910        | 6.43181275        | 8                      | 4.48502282         | 4.49575245        | 6.44092939        |
| <b>Center</b>          | <b>4.48970889</b> | <b>-0.02279613</b> | <b>9.62903232</b> | <b>Center</b>          | <b>-0.01613091</b> | <b>4.48638669</b> | <b>9.63766187</b> |

  

| Cubo-octahedral cage 3 |                   |                    |                   | Cubo-octahedral cage 4 |                    |                   |                   |
|------------------------|-------------------|--------------------|-------------------|------------------------|--------------------|-------------------|-------------------|
| Pb                     | x                 | y                  | z                 | Pb                     | x                  | y                 | z                 |
| 1                      | 4.48502282        | -4.52497455        | 6.40463895        | 1                      | -0.00648841        | -0.01687046       | 6.41278142        |
| 2                      | -0.00648841       | -0.01687046        | 6.41278142        | 2                      | -4.52665678        | 4.49339110        | 6.42189806        |
| 3                      | 4.48502282        | 4.49575245         | 6.44092939        | 3                      | -0.00648841        | 9.00385654        | 6.44907186        |
| 4                      | 9.00519119        | -0.01450910        | 6.43181275        | 4                      | 4.48502282         | 4.49575245        | 6.44092939        |
| 5                      | 4.49286298        | -4.54066856        | -0.00762939       | 5                      | -0.02424142        | -0.03175931       | 0.00161652        |
| 6                      | -0.02424142       | -0.03175931        | 0.00161652        | 6                      | -4.51881662        | 4.47769709        | 0.00962972        |
| 7                      | 4.49286298        | 4.48005844         | 0.02866105        | 7                      | -0.02424142        | 8.98896769        | 0.03790696        |
| 8                      | 8.98743818        | -0.02939796        | 0.02064785        | 8                      | 4.49286298         | 4.48005844        | 0.02866105        |
| <b>Center</b>          | <b>4.48970889</b> | <b>-0.02279613</b> | <b>3.21668232</b> | <b>Center</b>          | <b>-0.01613091</b> | <b>4.48638669</b> | <b>3.22531187</b> |

## Structural parameters

**Table S8.** Comparison between the experimental structural parameters (Exp.) and the theoretical ones obtained in this work (identified simple through "Theo."). Extructural information for CsPI, MAPI, and FAPI was extracted from Ref. [1], [2], and [3].

|                    | Perovskite a (Å) - Exp. | a (Å) - Theo.        | b (Å) - Exp. | b (Å) - Theo.       | c (Å) - Exp. | c (Å) - Theo.        | $\alpha$ (°) - Theo.  | $\beta$ (°) - Theo.   | $\gamma$ (°) - Theo.  | Volume (Å <sup>3</sup> ) - Exp. | Volume (Å <sup>3</sup> ) - Theo. | Pb-I (Å) - Exp. | Pb-I (Å) - Theo.    |
|--------------------|-------------------------|----------------------|--------------|---------------------|--------------|----------------------|-----------------------|-----------------------|-----------------------|---------------------------------|----------------------------------|-----------------|---------------------|
| CsPI               | 8.74                    | 8.29<br><b>-5.1%</b> | 8.74         | 9.12<br><b>4.4%</b> | 12.35        | 12.60<br><b>2.0%</b> | 92.96<br><b>3.3%</b>  | 90.59<br><b>0.7%</b>  | 89.48<br><b>-0.6%</b> | 942.70                          | 951.01<br><b>0.9%</b>            | 3.09            | 3.17<br><b>2.5%</b> |
| MAPI               | 8.81                    | 8.96<br><b>1.7%</b>  | 8.81         | 8.96<br><b>1.7%</b> | 12.71        | 12.82<br><b>0.8%</b> | 90.02<br><b>0.0%</b>  | 89.99<br><b>0.0%</b>  | 90.00<br><b>0.0%</b>  | 985.87                          | 1028.84<br><b>4.4%</b>           | 3.17            | 3.22<br><b>1.4%</b> |
| FAPbI <sub>3</sub> | 9.00                    | 9.01<br><b>0.2%</b>  | 9.00         | 9.02<br><b>0.3%</b> | 12.72        | 12.82<br><b>0.8%</b> | 89.77<br><b>-0.3%</b> | 89.88<br><b>-0.1%</b> | 89.98<br><b>0.0%</b>  | 1030.01                         | 1042.54<br><b>1.2%</b>           | 3.18            | 3.23<br><b>1.5%</b> |

**Table S9. Structural characterization of the lead-halide bonds.**

|                |                             | Pb-I bond length (Å)        |                   |         |         |
|----------------|-----------------------------|-----------------------------|-------------------|---------|---------|
| Type of I atom | No. of I atom               | CsPI                        | MAPI              | FAPI    |         |
| Equatorial     | 1                           | 3.251                       | 3.199             | 3.259   |         |
|                |                             | 3.217                       | 3.203             | 3.257   |         |
|                | 2                           | 3.210                       | 3.248             | 3.247   |         |
|                |                             | 3.241                       | 3.253             | 3.251   |         |
|                | 3                           | 3.240                       | 3.255             | 3.247   |         |
|                |                             | 3.218                       | 3.238             | 3.252   |         |
|                | 4                           | 3.213                       | 3.195             | 3.260   |         |
|                |                             | 3.238                       | 3.202             | 3.256   |         |
|                | 5                           | 3.110                       | 3.194             | 3.244   |         |
|                |                             | 3.103                       | 3.202             | 3.253   |         |
|                | 6                           | 3.084                       | 3.251             | 3.250   |         |
|                |                             | 3.078                       | 3.242             | 3.262   |         |
|                | 7                           | 3.107                       | 3.242             | 3.263   |         |
|                |                             | 3.105                       | 3.247             | 3.249   |         |
|                | 8                           | 3.080                       | 3.196             | 3.252   |         |
|                |                             | 3.081                       | 3.191             | 3.242   |         |
|                | Average                     | 3.16                        | 3.22              | 3.25    |         |
|                | Standard deviation (sample) | 0.07                        | 0.03              | 0.01    |         |
| Apical         | 1                           | 3.149                       | 3.210             | 3.176   |         |
|                |                             | 3.175                       | 3.218             | 3.236   |         |
|                | 2                           | 3.159                       | 3.209             | 3.176   |         |
|                |                             | 3.204                       | 3.217             | 3.235   |         |
|                | 3                           | 3.170                       | 3.212             | 3.176   |         |
|                |                             | 3.155                       | 3.217             | 3.236   |         |
|                | 4                           | 3.203                       | 3.216             | 3.178   |         |
|                |                             | 3.159                       | 3.217             | 3.236   |         |
|                |                             | Average                     | 3.17              | 3.21    | 3.21    |
|                |                             | Standard deviation (sample) | 0.02              | 0.00    | 0.03    |
|                |                             |                             | Pb-I-Pb angle (°) |         |         |
|                | Equatorial                  | 1                           | CsPbI3            | MAPbI3  | FAPbI3  |
|                |                             |                             | 146.681           | 159.103 | 156.962 |
|                |                             | 2                           | 144.064           | 158.232 | 156.909 |
|                |                             |                             | 146.325           | 158.208 | 156.974 |
|                |                             | 3                           | 143.678           | 158.777 | 156.774 |
| 170.065        |                             |                             | 160.315           | 157.046 |         |
| 4              |                             | 168.986                     | 158.559           | 157.415 |         |
|                |                             | 169.897                     | 158.005           | 157.410 |         |
| 5              |                             | 168.999                     | 160.131           | 156.954 |         |
|                |                             | 157.34                      | 158.92            | 157.06  |         |
|                |                             | Standard deviation (sample) | 13.03             | 0.88    | 0.23    |
| Apical         |                             | 1                           | 170.127           | 172.650 | 179.240 |
|                |                             | 2                           | 164.050           | 172.836 | 179.398 |
|                |                             | 3                           | 169.968           | 171.838 | 179.788 |
|                |                             | 4                           | 164.065           | 170.891 | 179.661 |
|                |                             | Average                     | 167.05            | 172.05  | 179.52  |
|                | Standard deviation (sample) | 3.46                        | 0.89              | 0.25    |         |



**Table S10. Pb-I bond lengths within each octahedron.**

| Octahedron number                 | Pb-I bond label | CsPI  | MAPI  | FAPi  |
|-----------------------------------|-----------------|-------|-------|-------|
| 1                                 | <i>l</i> 1      | 3.103 | 3.202 | 3.253 |
|                                   | <i>l</i> 2      | 3.078 | 3.242 | 3.262 |
|                                   | <i>l</i> 3      | 3.105 | 3.247 | 3.249 |
|                                   | <i>l</i> 4      | 3.081 | 3.191 | 3.242 |
|                                   | <i>l</i> 5      | 3.155 | 3.217 | 3.236 |
|                                   | <i>l</i> 6      | 3.149 | 3.210 | 3.176 |
|                                   | Average         | 3.11  | 3.22  | 3.24  |
| Standard deviation (sample)       |                 | 0.03  | 0.02  | 0.03  |
| 2                                 | <i>l</i> 1      | 3.217 | 3.203 | 3.257 |
|                                   | <i>l</i> 2      | 3.241 | 3.253 | 3.251 |
|                                   | <i>l</i> 3      | 3.218 | 3.238 | 3.252 |
|                                   | <i>l</i> 4      | 3.238 | 3.202 | 3.256 |
|                                   | <i>l</i> 5      | 3.175 | 3.218 | 3.236 |
|                                   | <i>l</i> 6      | 3.170 | 3.212 | 3.176 |
|                                   | Average         | 3.21  | 3.22  | 3.24  |
| Standard deviation (sample)       |                 | 0.03  | 0.02  | 0.03  |
| 3                                 | <i>l</i> 1      | 3.107 | 3.242 | 3.263 |
|                                   | <i>l</i> 2      | 3.080 | 3.196 | 3.252 |
|                                   | <i>l</i> 3      | 3.110 | 3.194 | 3.244 |
|                                   | <i>l</i> 4      | 3.084 | 3.251 | 3.250 |
|                                   | <i>l</i> 5      | 3.159 | 3.217 | 3.236 |
|                                   | <i>l</i> 6      | 3.159 | 3.209 | 3.176 |
|                                   | Average         | 3.12  | 3.22  | 3.24  |
| Standard deviation (sample)       |                 | 0.04  | 0.02  | 0.03  |
| 4                                 | <i>l</i> 1      | 3.240 | 3.255 | 3.247 |
|                                   | <i>l</i> 2      | 3.213 | 3.195 | 3.260 |
|                                   | <i>l</i> 3      | 3.251 | 3.199 | 3.259 |
|                                   | <i>l</i> 4      | 3.210 | 3.248 | 3.247 |
|                                   | <i>l</i> 5      | 3.204 | 3.217 | 3.235 |
|                                   | <i>l</i> 6      | 3.203 | 3.216 | 3.178 |
|                                   | Average         | 3.22  | 3.22  | 3.24  |
| Standard deviation (sample)       |                 | 0.02  | 0.02  | 0.03  |
| Total average                     |                 | 3.16  | 3.22  | 3.24  |
| Total standard deviation (sample) |                 | 0.06  | 0.02  | 0.03  |

**Table S11. I-Pb-I bond angles within each octahedron (Part I).**

| Octahedron number | Internal I-Pb-I angle       | CsPI    | MAPI   | FAPI   |
|-------------------|-----------------------------|---------|--------|--------|
| 1                 | $\Phi_1$                    | 90.641  | 92.981 | 89.064 |
|                   | $\Phi_2$                    | 88.824  | 91.636 | 88.835 |
|                   | $\Phi_3$                    | 89.205  | 85.690 | 88.813 |
|                   | $\Phi_4$                    | 91.152  | 87.547 | 89.075 |
|                   | $\Phi_5$                    | 89.507  | 95.953 | 90.569 |
|                   | $\Phi_6$                    | 91.082  | 87.992 | 90.612 |
|                   | $\Phi_7$                    | 90.647  | 85.362 | 91.551 |
|                   | $\Phi_8$                    | 88.941  | 92.874 | 91.477 |
|                   | $\Phi_9$                    | 84.305  | 88.843 | 89.709 |
|                   | $\Phi_{10}$                 | 95.488  | 89.013 | 89.909 |
|                   | $\Phi_{11}$                 | 84.139  | 91.308 | 90.169 |
|                   | $\Phi_{12}$                 | 96.068  | 90.815 | 90.135 |
|                   |                             | Average | 90.00  | 90.00  |
|                   | Standard deviation (sample) | 3.57    | 3.16   | 0.95   |
| 2                 | $\Phi_1$                    | 87.000  | 87.403 | 89.200 |
|                   | $\Phi_2$                    | 86.858  | 85.778 | 88.865 |
|                   | $\Phi_3$                    | 93.035  | 90.977 | 88.748 |
|                   | $\Phi_4$                    | 92.856  | 92.791 | 88.955 |
|                   | $\Phi_5$                    | 93.017  | 92.995 | 90.752 |
|                   | $\Phi_6$                    | 93.033  | 85.574 | 91.114 |
|                   | $\Phi_7$                    | 86.948  | 88.590 | 91.300 |
|                   | $\Phi_8$                    | 87.253  | 95.848 | 91.065 |
|                   | $\Phi_9$                    | 84.071  | 90.502 | 89.902 |
|                   | $\Phi_{10}$                 | 95.751  | 89.262 | 90.214 |
|                   | $\Phi_{11}$                 | 84.099  | 89.575 | 89.821 |
|                   | $\Phi_{12}$                 | 96.079  | 90.619 | 89.985 |
|                   |                             | Average | 90.00  | 89.99  |
|                   | Standard deviation (sample) | 4.38    | 3.01   | 0.92   |

**Table S11. I-Pb-I bond angles within each octahedron (Part II).**

| Octahedron number                 | Internal I-Pb-I angle | CsPI   | MAPI   | FAP1   |
|-----------------------------------|-----------------------|--------|--------|--------|
| 3                                 | $\Phi_1$              | 87.174 | 91.161 | 89.039 |
|                                   | $\Phi_2$              | 89.569 | 93.519 | 89.003 |
|                                   | $\Phi_3$              | 92.805 | 87.640 | 88.822 |
|                                   | $\Phi_4$              | 90.465 | 85.733 | 88.889 |
|                                   | $\Phi_5$              | 93.024 | 88.383 | 90.344 |
|                                   | $\Phi_6$              | 90.224 | 95.497 | 90.837 |
|                                   | $\Phi_7$              | 86.996 | 92.909 | 91.795 |
|                                   | $\Phi_8$              | 89.741 | 85.237 | 91.267 |
|                                   | $\Phi_9$              | 84.150 | 89.604 | 89.690 |
|                                   | $\Phi_{10}$           | 95.645 | 88.891 | 90.244 |
|                                   | $\Phi_{11}$           | 83.956 | 90.499 | 90.095 |
|                                   | $\Phi_{12}$           | 96.249 | 90.989 | 89.892 |
|                                   | Promedio              |        | 90.00  | 90.01  |
| DESVEST                           |                       | 4.00   | 3.08   | 0.97   |
| 4                                 | $\Phi_1$              | 82.368 | 85.484 | 89.209 |
|                                   | $\Phi_2$              | 88.920 | 87.410 | 88.978 |
|                                   | $\Phi_3$              | 97.718 | 93.047 | 88.761 |
|                                   | $\Phi_4$              | 90.912 | 91.242 | 88.865 |
|                                   | $\Phi_5$              | 97.878 | 85.148 | 90.961 |
|                                   | $\Phi_6$              | 90.876 | 93.348 | 90.875 |
|                                   | $\Phi_7$              | 82.036 | 96.300 | 91.069 |
|                                   | $\Phi_8$              | 89.290 | 87.953 | 91.282 |
|                                   | $\Phi_9$              | 85.279 | 90.501 | 89.996 |
|                                   | $\Phi_{10}$           | 94.547 | 90.890 | 89.811 |
|                                   | $\Phi_{11}$           | 85.038 | 89.361 | 89.959 |
|                                   | $\Phi_{12}$           | 95.136 | 89.212 | 90.157 |
|                                   | Average               |        | 90.00  | 89.99  |
| Standard deviation (sample)       |                       | 5.56   | 3.28   | 0.91   |
| Total average                     |                       | 90.00  | 90.00  | 89.99  |
| Total standard deviation (sample) |                       | 4.30   | 3.03   | 0.91   |

## Hydrogen bonds

| <b>Table S12.</b> Hydrogen bond lengths within FAPI and MAPI. |                             |         |         |         |         |         |
|---------------------------------------------------------------|-----------------------------|---------|---------|---------|---------|---------|
| No. of cubo-<br>octahedral cage                               | X—H...I type                | FAPI    |         | MAPI    |         |         |
| 1                                                             | N—H...I                     | 3.164   | 132.440 | 2.593   | 166.430 |         |
|                                                               |                             | 3.123   | 133.469 |         |         |         |
|                                                               |                             | 3.002   | 135.283 |         |         |         |
|                                                               |                             | 3.021   | 134.288 |         |         |         |
|                                                               |                             | 3.144   | 126.529 |         |         |         |
|                                                               | C—H...I                     | 3.165   | 125.654 | 2.618   | 161.068 |         |
|                                                               |                             | Average | 3.10    |         |         | 131.28  |
|                                                               | Standard deviation (sample) |         | 0.07    | 4.13    | 0.02    | 3.79    |
|                                                               | 2                           | N—H...I | 3.155   | 132.800 | 2.611   | 163.764 |
|                                                               |                             |         | 3.135   | 133.179 |         |         |
| 3.008                                                         |                             |         | 134.829 |         |         |         |
| 3.012                                                         |                             |         | 134.697 |         |         |         |
| 3.153                                                         |                             |         | 126.098 |         |         |         |
| C—H...I                                                       |                             | 3.155   | 125.966 | 2.602   | 163.660 |         |
|                                                               |                             | Average | 3.10    |         |         | 131.26  |
| Standard deviation (sample)                                   |                             | 0.07    | 4.13    | 0.01    | 0.07    |         |
| 3                                                             |                             | N—H...I | 3.132   | 132.682 | 2.607   | 164.978 |
|                                                               |                             |         | 3.122   | 133.280 |         |         |
|                                                               | 3.015                       |         | 134.827 |         |         |         |
|                                                               | 3.028                       |         | 134.359 |         |         |         |
|                                                               | 3.152                       |         | 126.573 |         |         |         |
|                                                               | C—H...I                     | 3.159   | 126.092 | 2.587   | 164.988 |         |
|                                                               |                             | Average | 3.10    |         |         | 131.30  |
|                                                               | Standard deviation (sample) |         | 0.06    | 3.93    | 0.01    | 0.01    |
|                                                               | 4                           | N—H...I | 3.151   | 132.599 | 2.584   | 169.353 |
|                                                               |                             |         | 3.109   | 133.550 |         |         |
| 3.013                                                         |                             |         | 134.872 |         |         |         |
| 3.030                                                         |                             |         | 134.299 |         |         |         |
| 3.151                                                         |                             |         | 126.646 |         |         |         |
| C—H...I                                                       |                             | 3.157   | 126.147 | 2.599   | 162.902 |         |
|                                                               |                             | Average | 3.10    |         |         | 131.35  |
| Standard deviation (sample)                                   |                             | 0.06    | 3.92    | 0.01    | 4.56    |         |
| Total average                                                 |                             | 3.10    | 131.30  | 2.60    | 164.64  |         |
| Total standard deviation (sample)                             |                             | 0.06    | 3.76    | 0.01    | 2.48    |         |

## COHP analysis for CsPI, MAPI, and FAPI

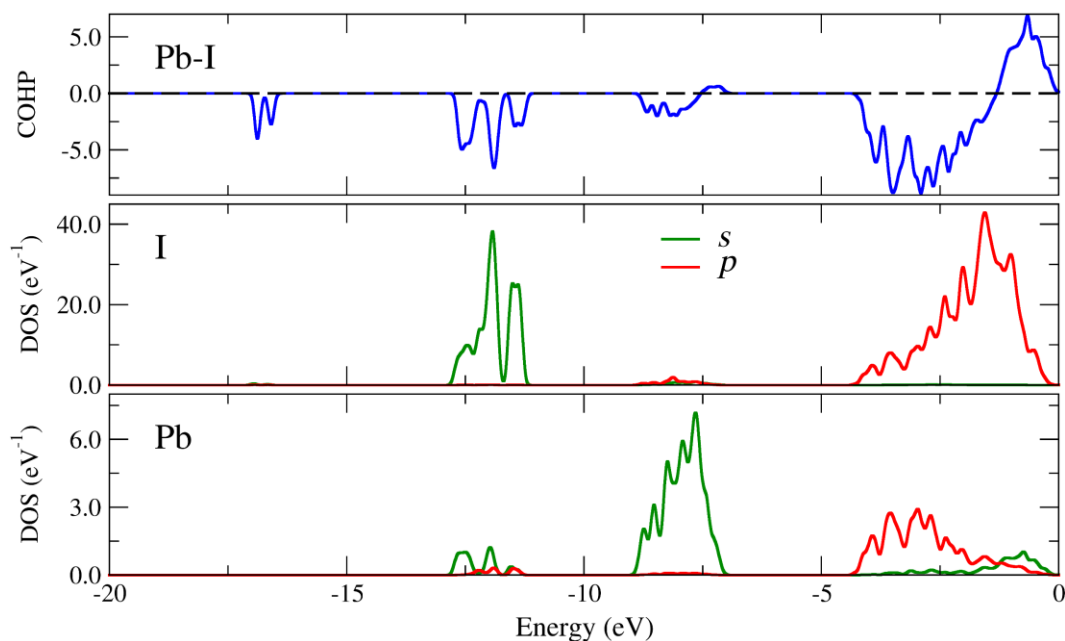

**Figure S1.** COHP curve of the Pb-I bonds within CsPI perovskite. The density of states from s and p orbitals of both I and Pb species are also shown for comparison. The ICOHP energy value was -16.21 eV.

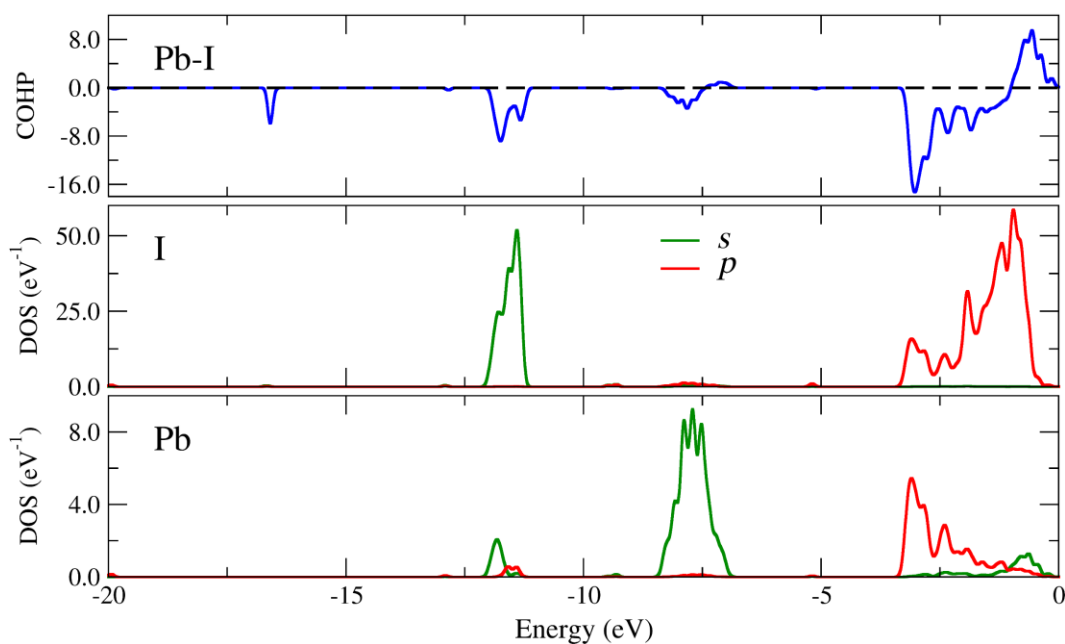

**Figure S2.** COHP curve of the Pb-I bonds within MAPI perovskite. The density of states from s and p orbitals of both I and Pb species are also shown for comparison. The ICOHP energy value was -15.37 eV.

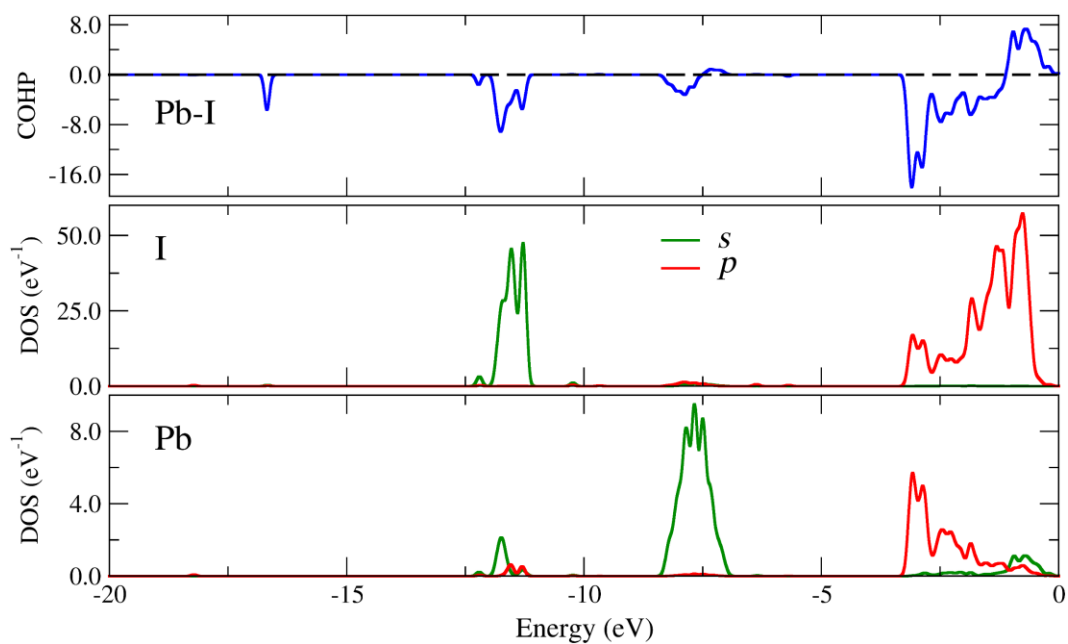

**Figure S3.** COHP curve of the Pb-I bonds within FAPI perovskite. The density of states from s and p orbitals of both I and Pb species are also shown for comparison. The ICOHP energy value was -15.27 eV.

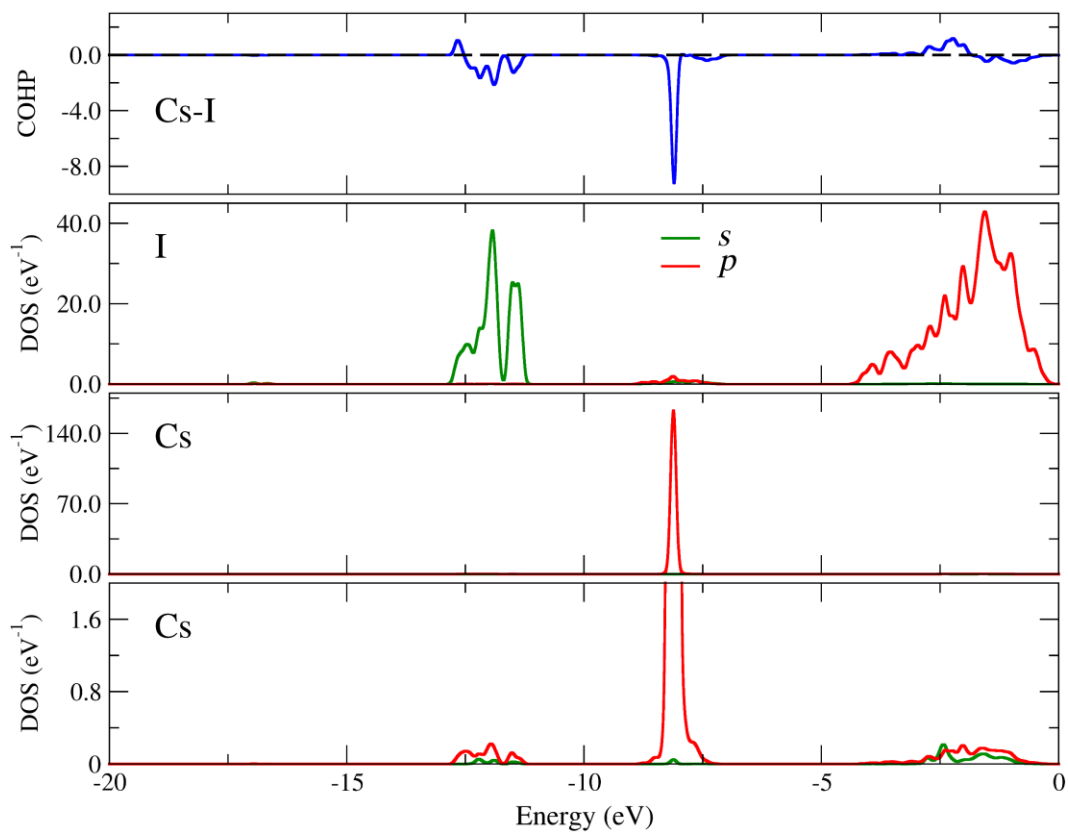

**Figure S4.** COHP curve of the Cs-I bonds within CsPI perovskite. The density of states from s and p orbitals of both Cs and I species are also shown for comparison. The ICOHP energy value was -2.25 eV.

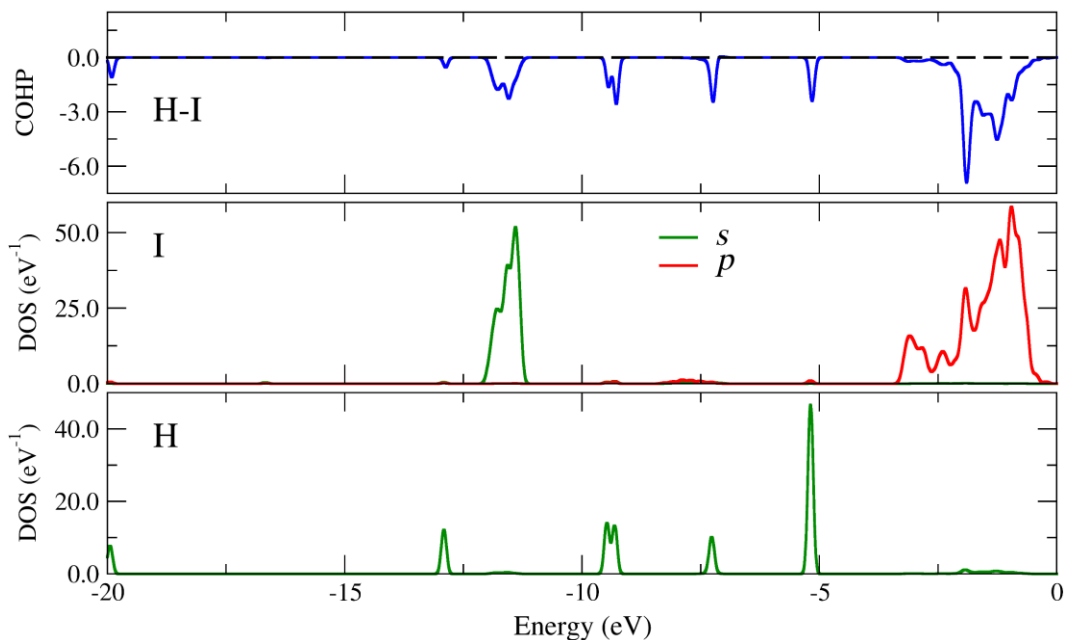

**Figure S5.** COHP curve of the H-I bonds within MAPI perovskite. The density of states from s and p orbitals of both H and I species are also shown for comparison. The ICOHP energy value was -7.02 eV.

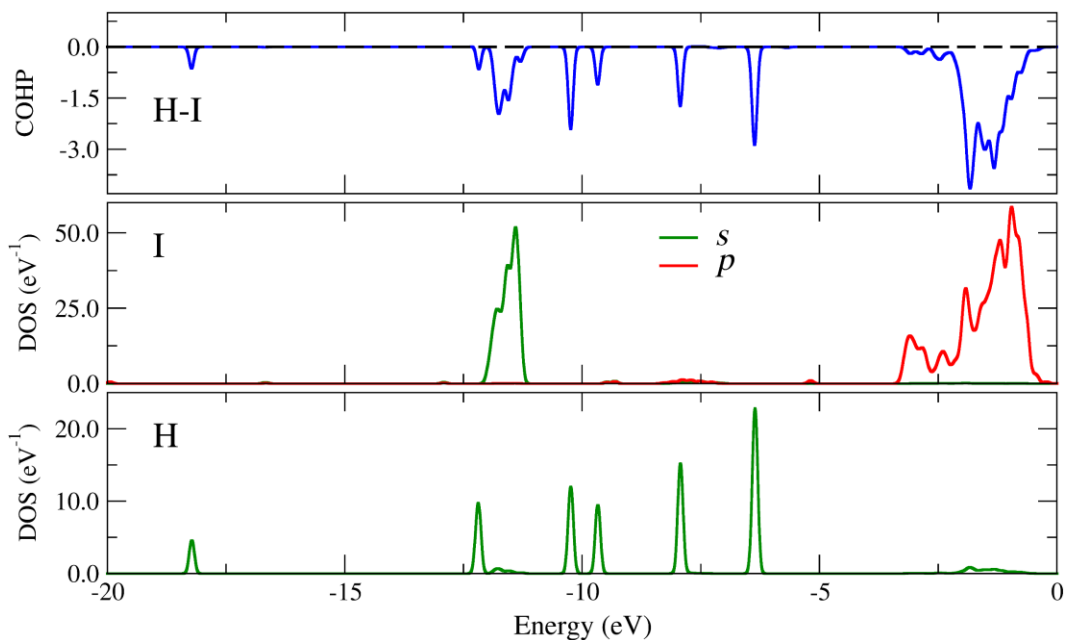

**Figure S6.** COHP curve of the H-I bonds within FAPI perovskite. The density of states from s and p orbitals of both H and I species are also shown for comparison. The ICOHP energy value was -5.43 eV.



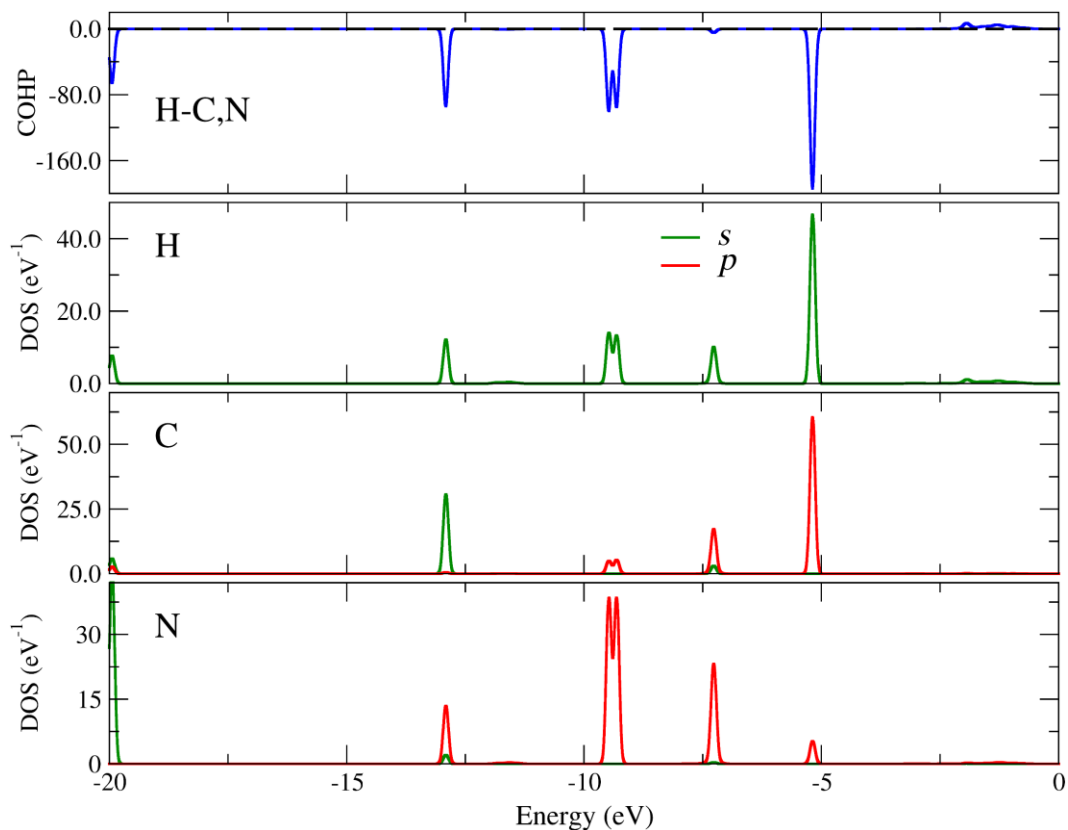

**Figure S7.** COHP curve of the H-C and H-N bonds (or simply H-C,N) within MAPI perovskite. The density of states from s and p orbitals of H, C, and N species are also shown for comparison. The ICOHP energy value was -65.70 eV.

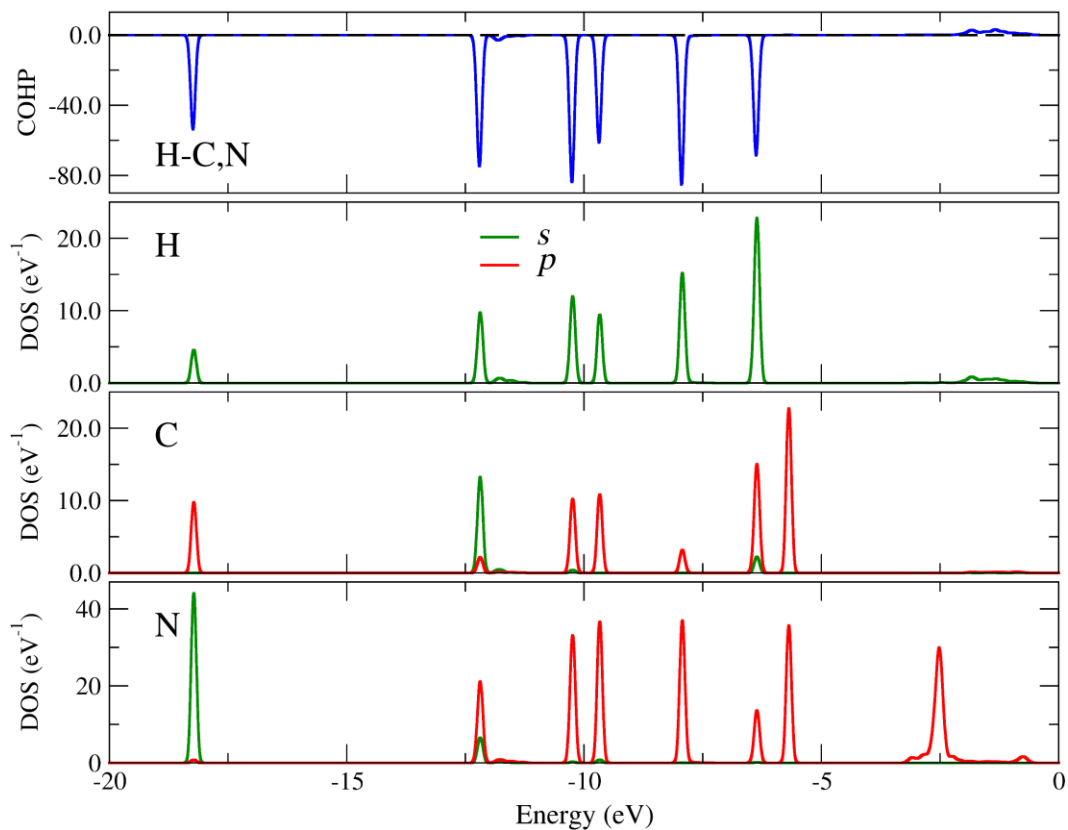

**Figure S8.** COHP curve of the H-C and H-N bonds (or simply H-C,N) within FAPI perovskite. The density of states from s and p orbitals of H, C, and N species are also shown for comparison. The ICOHP energy value was -55.58 eV.

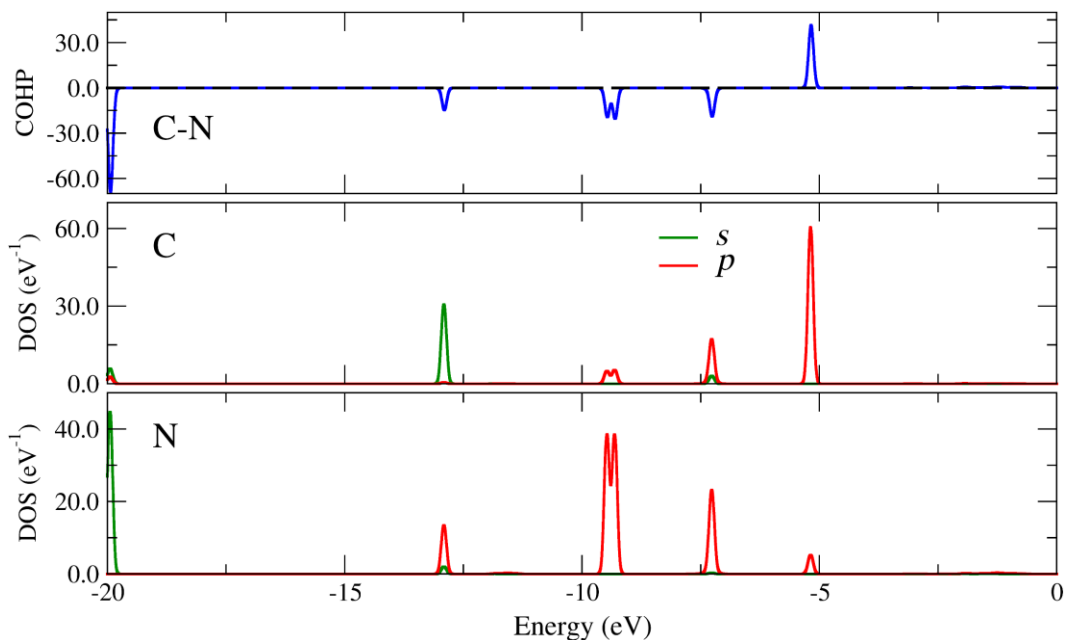

**Figure S9.** COHP curve of the C-N bonds within MAPI perovskite. The density of states from s and p orbitals of both C and N species are also shown for comparison. The ICOHP energy value was -11.99 eV.

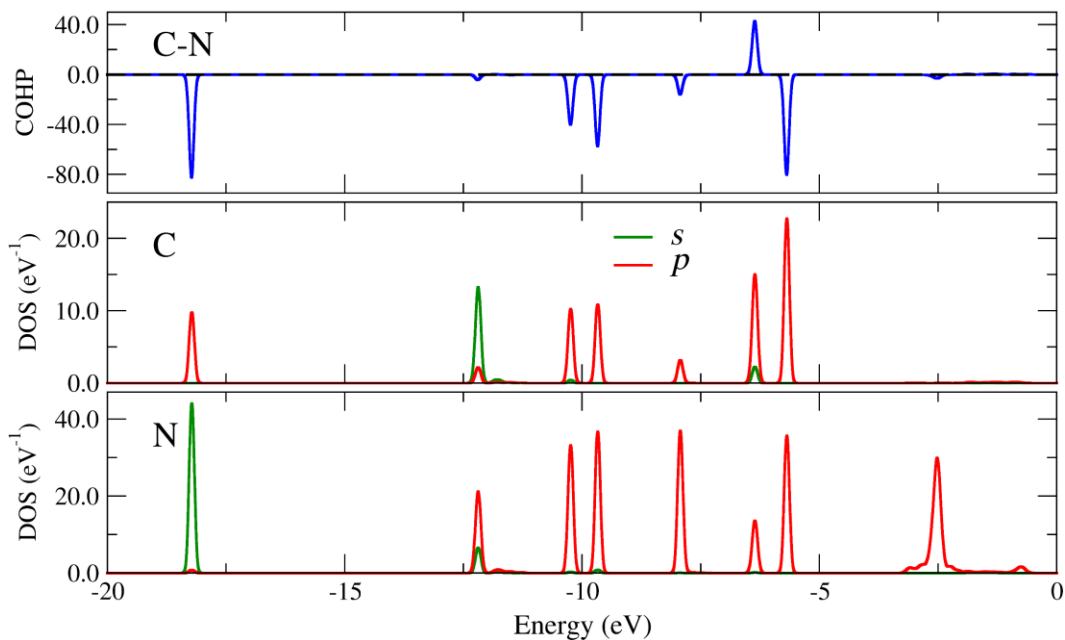

**Figure S10.** COHP curve of the C-N bonds within FAPI perovskite. The density of states from s and p orbitals of both C and N species are also shown for comparison. The ICOHP energy value was -46.40 eV.

## Band structures for the different functionals

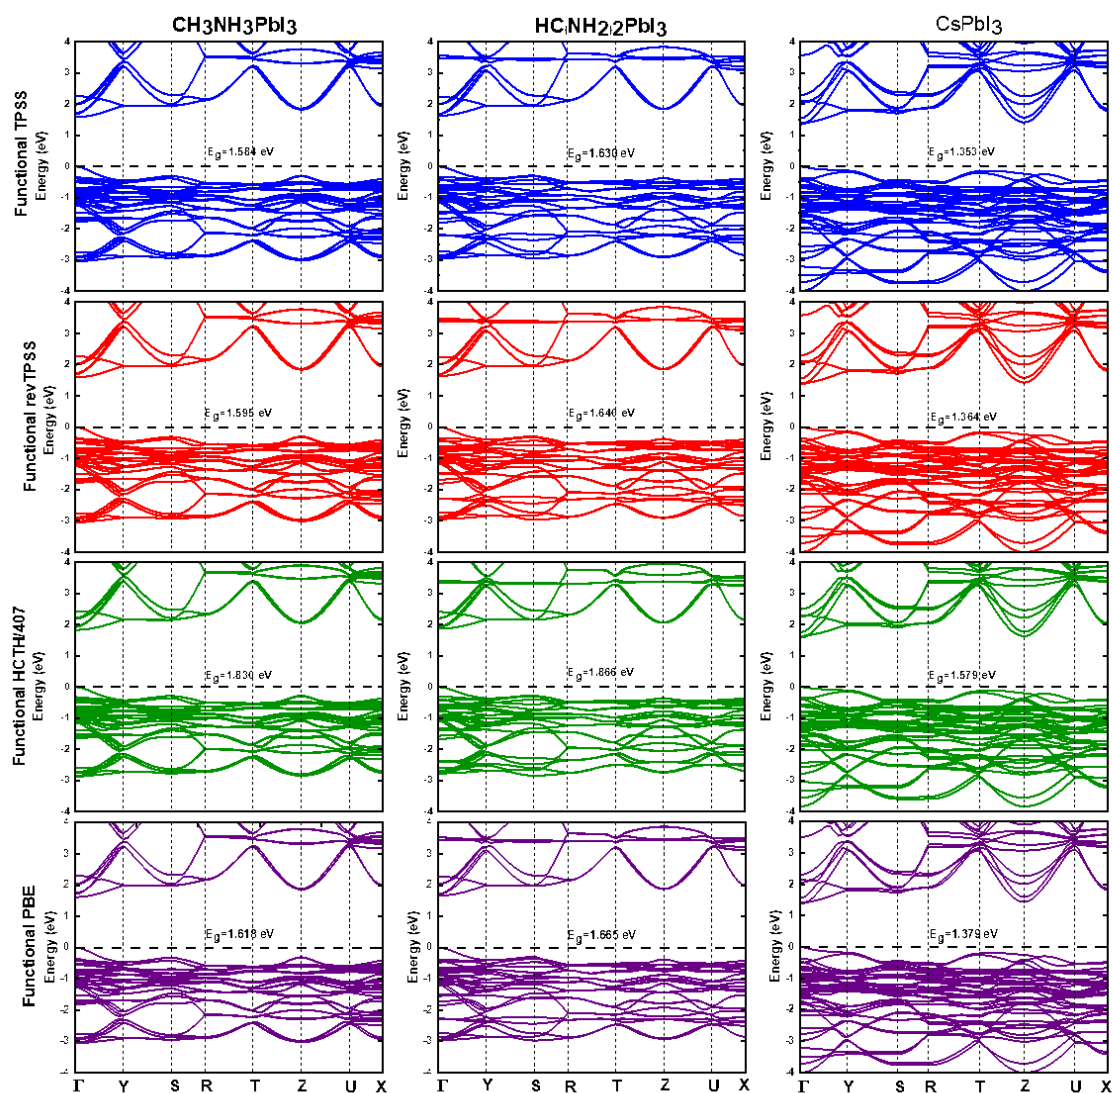

**Figure S11.** Comparison of the band structures for all three perovskites studied and calculated by means of the TPSS, revTPSS, HCTH/407 and PBE functionals.

## References

- [1] G. E. Eperon, G. M. Paterno, R. J. Sutton, A. Zampetti, A. A. Haghighirad, F. Cacialli, and H. J. Snaith. "Inorganic caesium lead iodide perovskite solar cells". *Journal of Materials Chemistry A*, 3(39), 19688-19695 (2015).
- [2] M. T. Weller, O. J. Weber, P. F. Henry, A. M. Di Pumpo, and T. C. Hansen. "Complete structure and cation orientation in the perovskite photovoltaic methylammonium lead iodide between 100 and 352 K". *Chemical Communications*, 51(20), 4180-4183 (2015).
- [3] M. T. Weller, O. J. Weber, J. M. Frost, and A. Walsh. "Cubic perovskite structure of black formamidinium lead iodide,  $\alpha$ -[HC(NH<sub>2</sub>)<sub>2</sub>]PbI<sub>3</sub>, at 298 K". *The Journal of Physical Chemistry Letters*, 6(16), 3209-3212 (2015).
